# Supplementary material
Source: MDPI journal article supplement (https://www.mdpi.com/2304-6775/6/4/40)

**Figure S01:** Absolute number of publications on *Cannabis* recovered from the Scopus platform using six different search arguments for each country, grouped by continents.

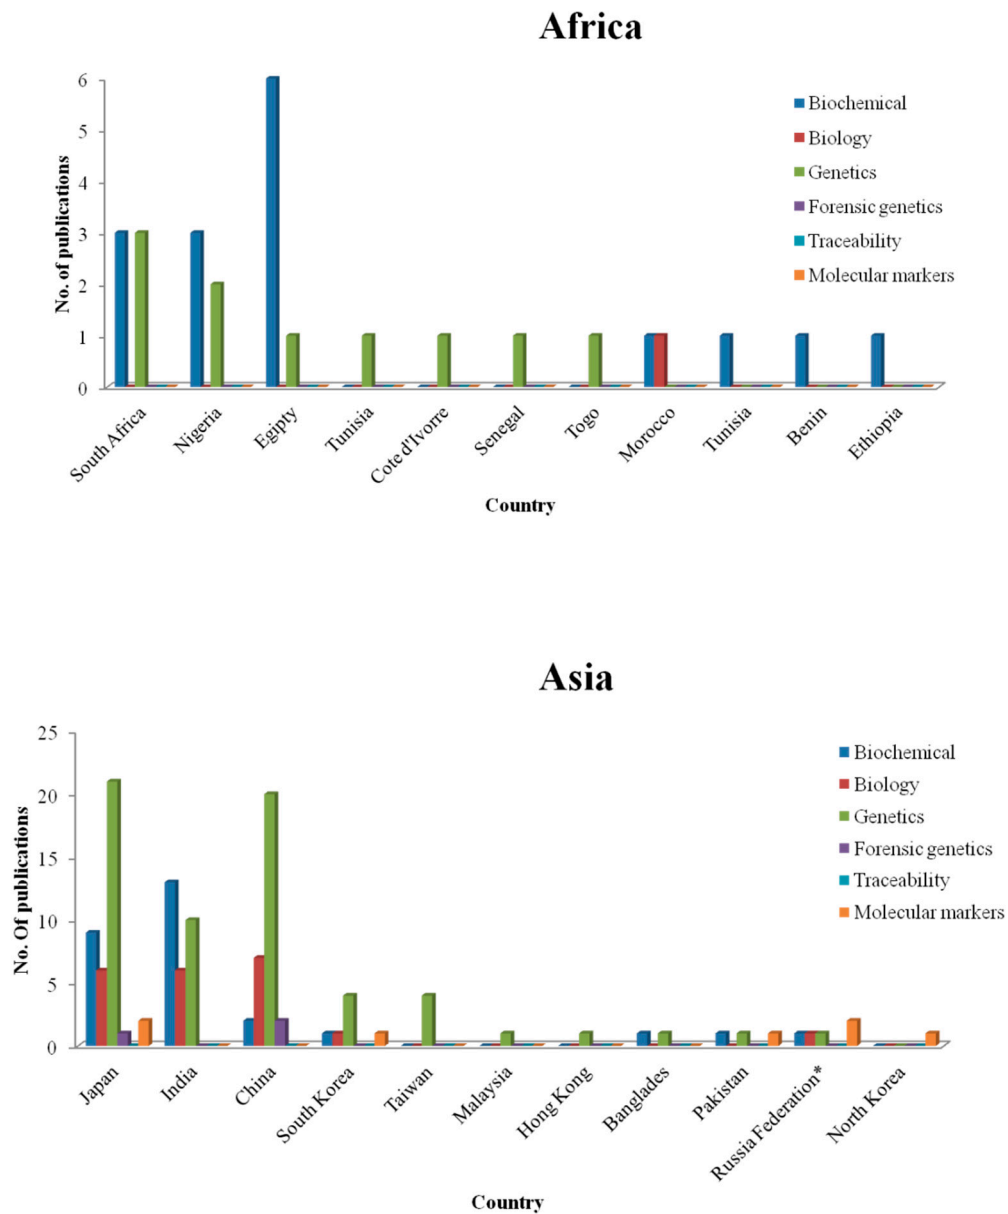

## North America

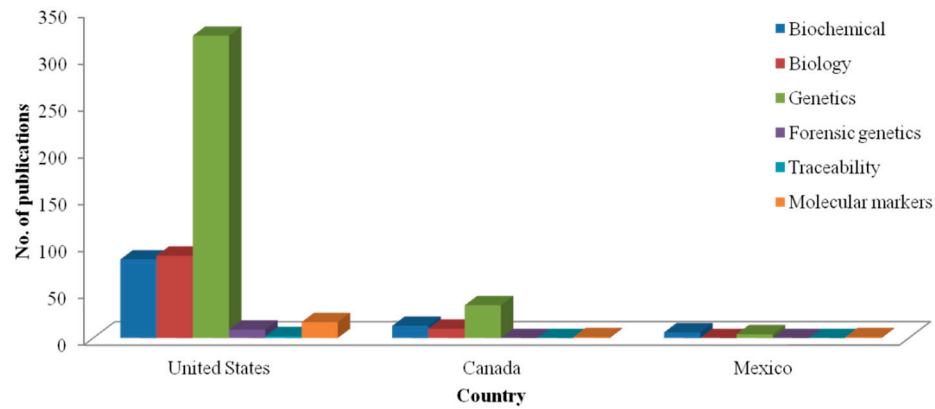

## Oceania

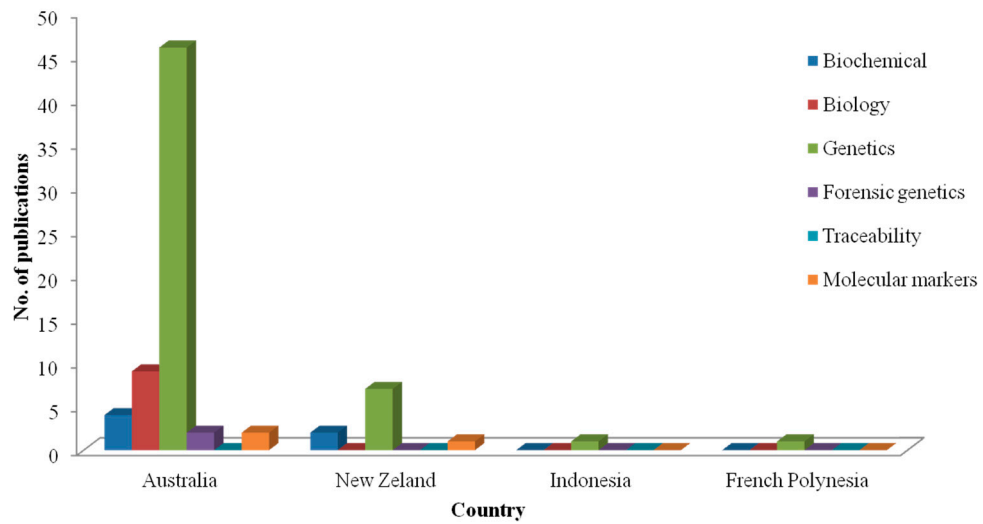

## Latin America

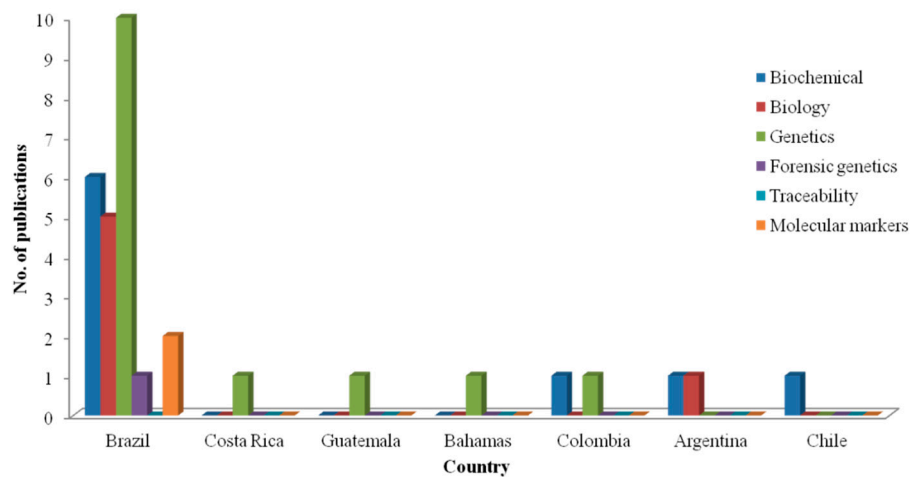

**Figure S02:** Flowchart of the scientific fields from the searched studies after the individual screening involving any keywords in this work.

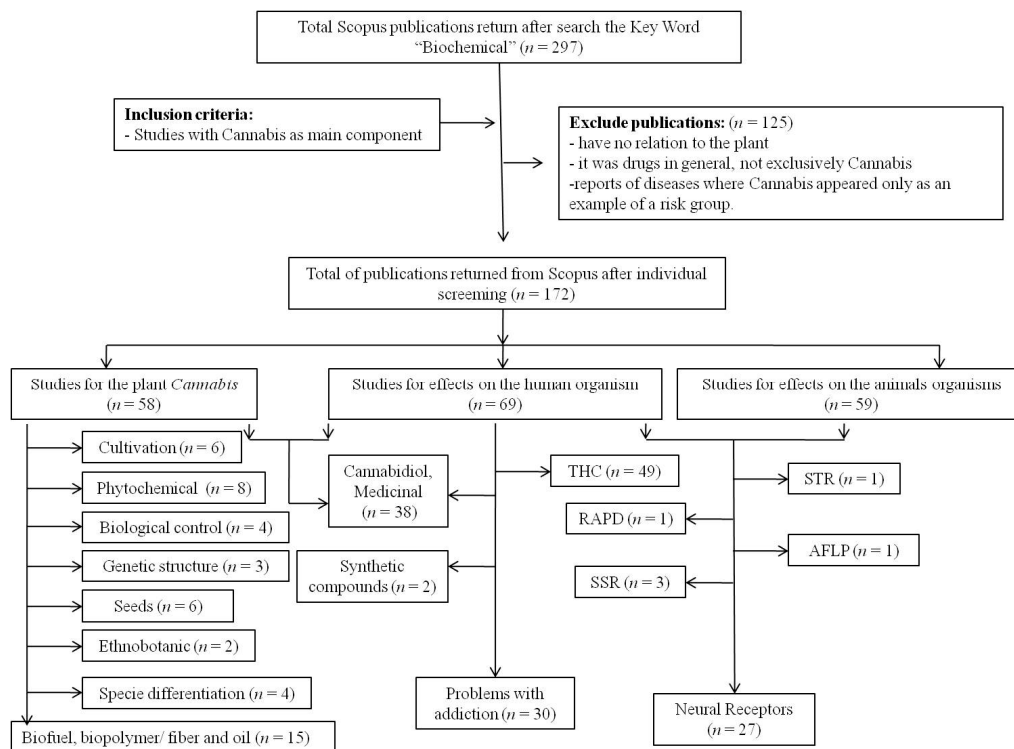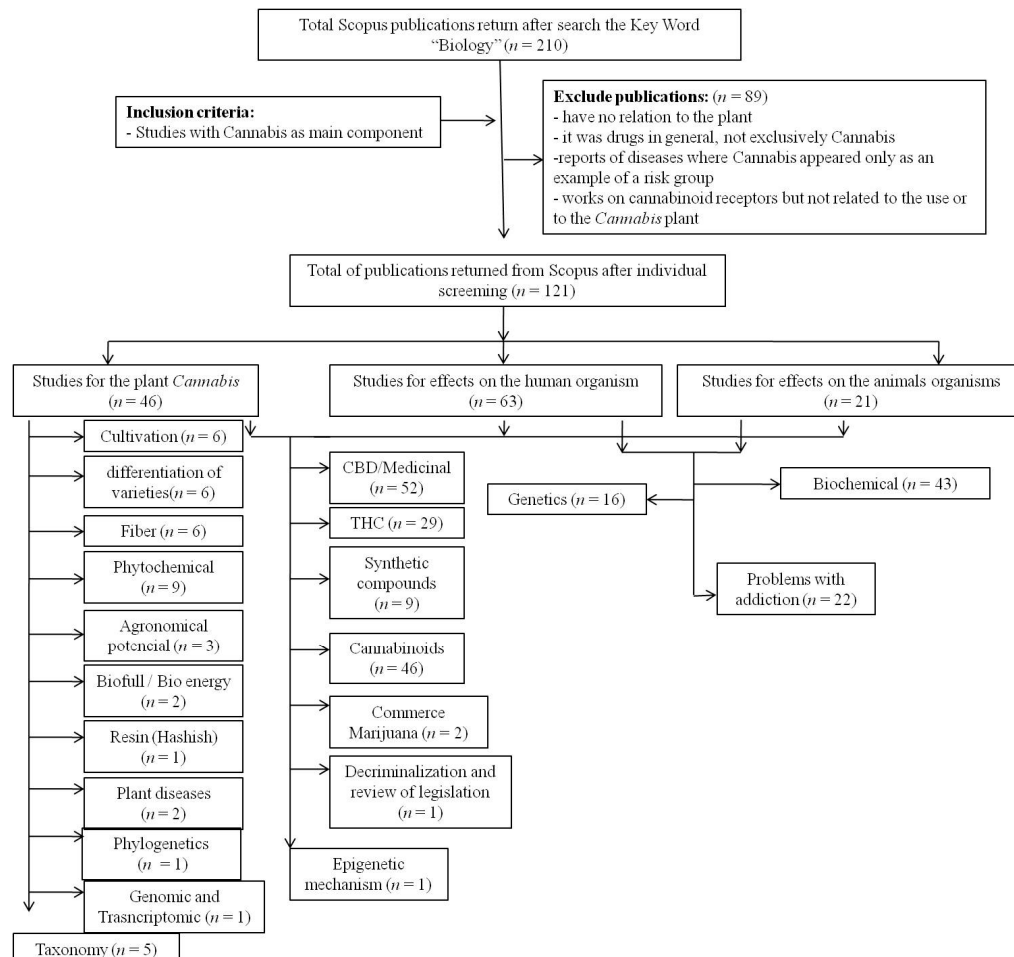

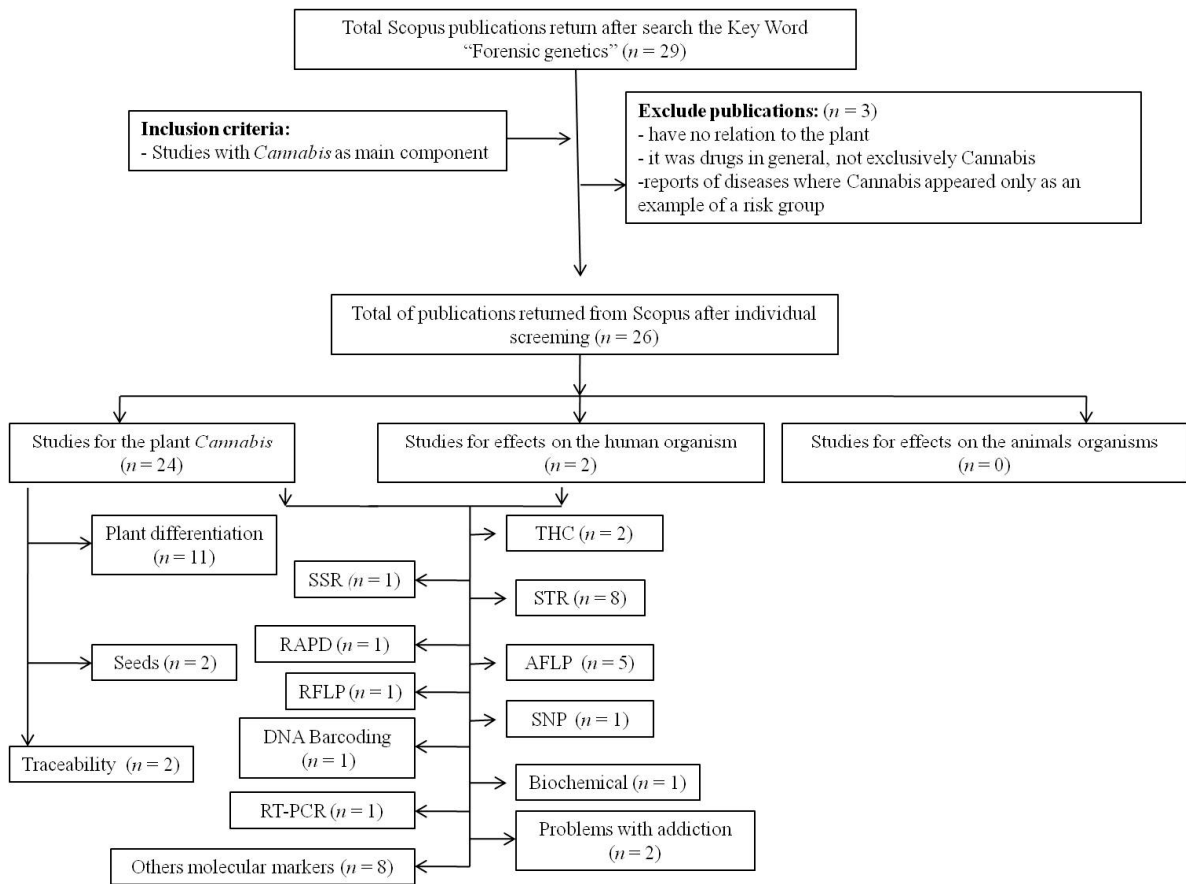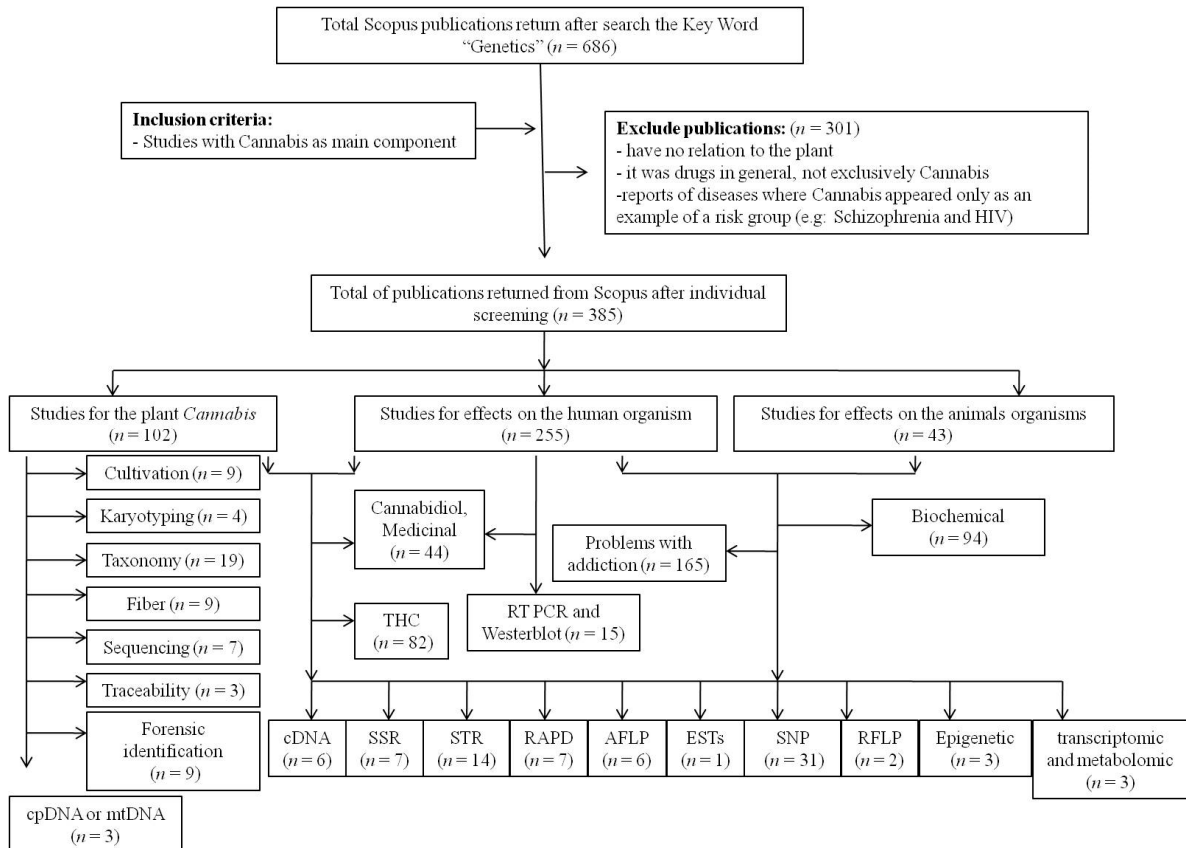

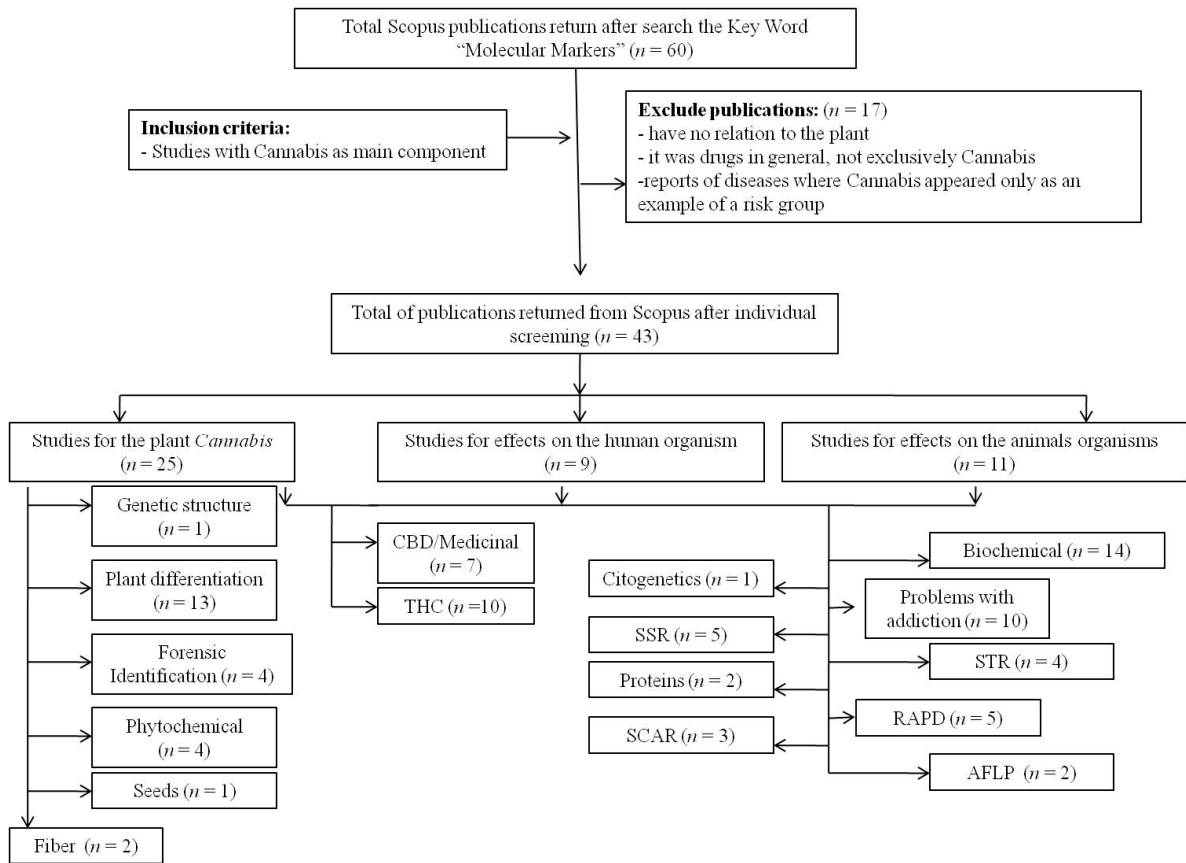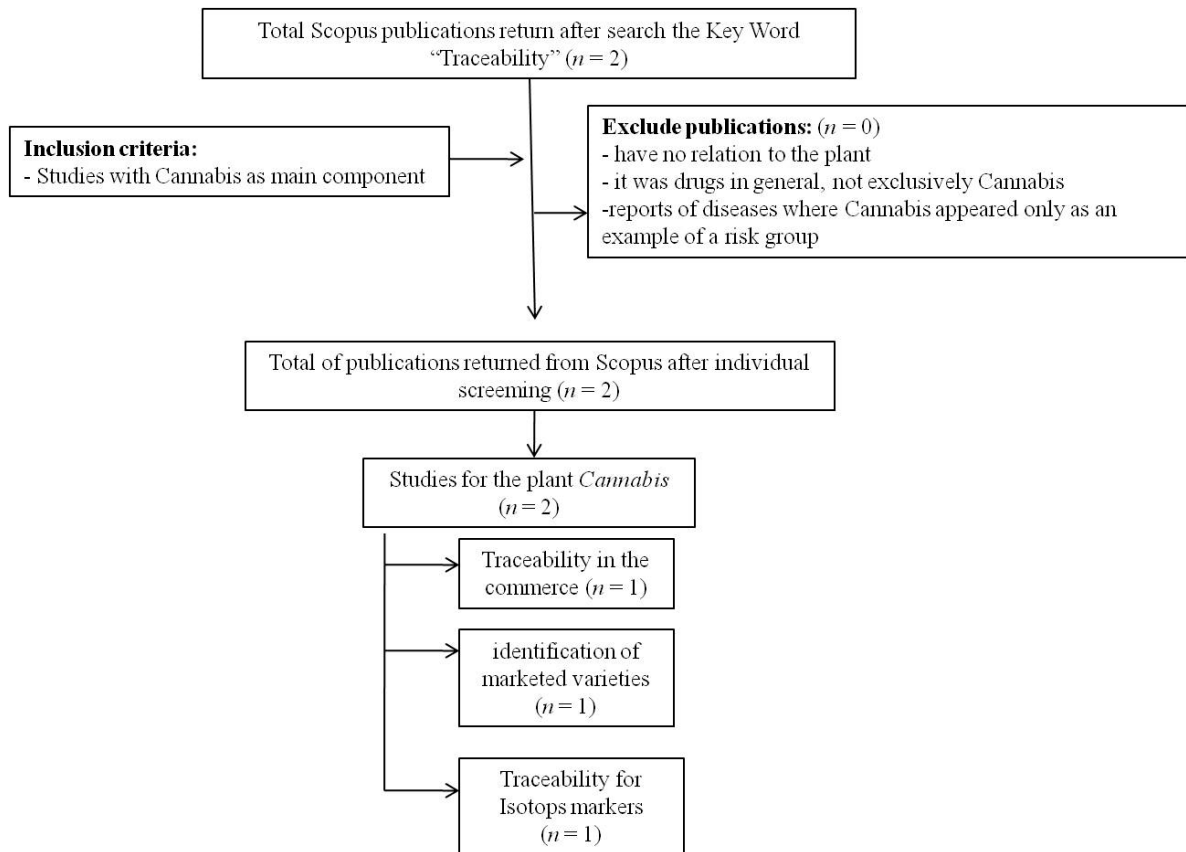

Supplement: s1 [file s1]
